# Supplementary material
Source: MDPI journal article supplement (https://www.mdpi.com/2072-4292/13/24/4961)

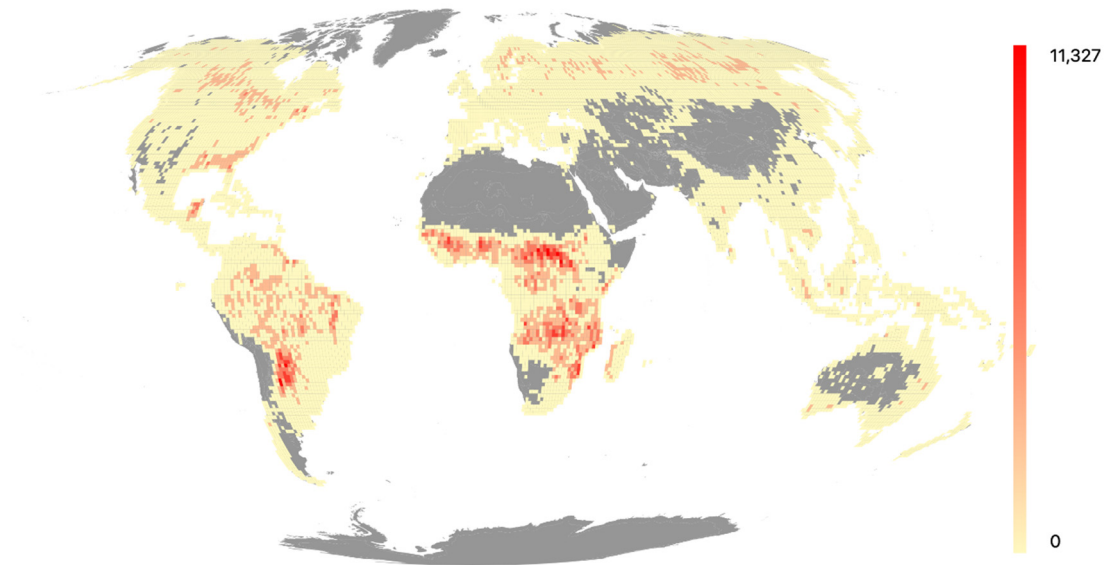

**Figure S1:** Map of distribution of ICESat GLAS footprints after filtering, represented as number of footprints per 1° grid square. Areas in grey have no footprints.

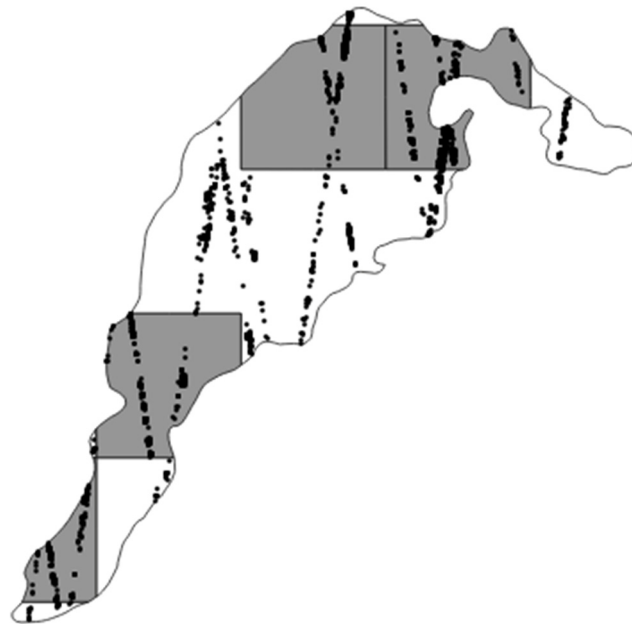

**Figure S2:** An ecoregion demonstrating the union generated with the 1° grid. Black dots represent ICESat GLAS footprints for the entire ecoregion. Areas in white use the underlying ecoregion q value which is calculated from all the ICESat GLAS footprints shown. Areas in grey are where the ecoregion has been subdivided by grid square, here the q value has been calculated using only the footprints within that grid square and ecoregion.

**Table S1:** Global mean canopy height and canopy density for each laser period of ICESat GLAS

| Laser period (dates)   | Mean Canopy Density | Mean Canopy Height |
|------------------------|---------------------|--------------------|
| Ph1 (02.2003-03.2003)  | 0.50                | 15.01              |
| Ph2a (09.2003-05.2004) | 0.53                | 14.56              |
| Ph2b (03.2009-09.2009) | 0.38                | 7.26               |
| Ph3 (10.2004-10.2008)  | 0.52                | 14.76              |

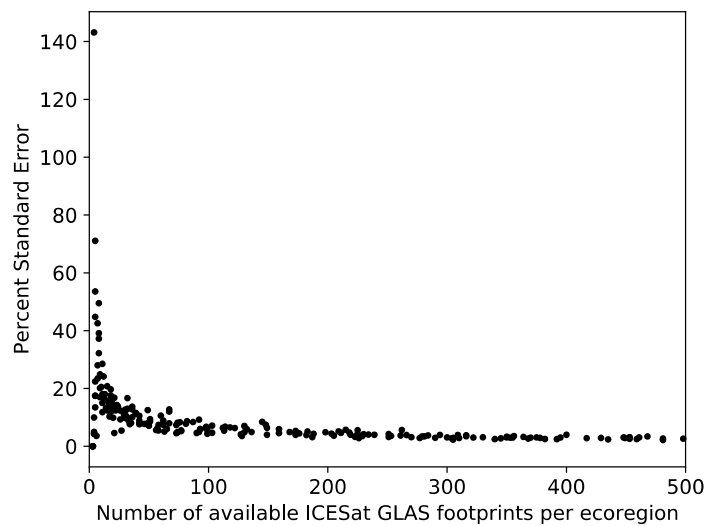

**Figure S3:** The influence of the number of footprints per polygon on the Standard error obtained. X axis is limited to 500 footprints for clarity.

**Table S2:** Descriptive statistics of the allometric parameter (q) and Mean Squared Error (MSE) for each biome.

| Biome                              | Mean (q) | Max (q) | Min (q) | Variance (q)          | Mean (MSE) | Variance (MSE)        |
|------------------------------------|----------|---------|---------|-----------------------|------------|-----------------------|
| TST <sup>(1)</sup> Moist Broadleaf | 0.083    | 0.153   | 0.036   | $2.79 \times 10^{-4}$ | 0.020      | $1.32 \times 10^{-4}$ |
| TST <sup>(1)</sup> Dry Broadleaf   | 0.076    | 0.130   | 0.033   | $2.91 \times 10^{-4}$ | 0.027      | $6.05 \times 10^{-5}$ |
| TST <sup>(1)</sup> Conifer         | 0.071    | 0.112   | 0.042   | $3.51 \times 10^{-4}$ | 0.031      | $1.44 \times 10^{-4}$ |
| Temperate Broadleaf                | 0.055    | 0.107   | 0.023   | $1.81 \times 10^{-4}$ | 0.042      | $1.33 \times 10^{-4}$ |
| Temperate Conifer                  | 0.051    | 0.103   | 0.020   | $1.88 \times 10^{-4}$ | 0.040      | $9.55 \times 10^{-5}$ |
| Boreal/Taiga                       | 0.048    | 0.094   | 0.021   | $1.41 \times 10^{-4}$ | 0.034      | $9.05 \times 10^{-5}$ |
| TST <sup>(1)</sup> Savanna         | 0.062    | 0.122   | 0.021   | $2.63 \times 10^{-4}$ | 0.023      | $7.01 \times 10^{-5}$ |
| Temperate Savanna                  | 0.054    | 0.127   | 0.021   | $3.0 \times 10^{-4}$  | 0.037      | $1.54 \times 10^{-4}$ |
| Flooded Savanna                    | 0.060    | 0.116   | 0.032   | $2.49 \times 10^{-4}$ | 0.027      | $1.66 \times 10^{-4}$ |
| Montane Shrublands                 | 0.065    | 0.097   | 0.028   | $1.11 \times 10^{-4}$ | 0.027      | $3.53 \times 10^{-5}$ |
| Tundra                             | 0.063    | 0.095   | 0.029   | $1.28 \times 10^{-4}$ | 0.339      | $4.10 \times 10^{-5}$ |
| Mediterranean                      | 0.063    | 0.108   | 0.024   | $3.46 \times 10^{-4}$ | 0.022      | $1.24 \times 10^{-4}$ |
| Desert                             | 0.071    | 0.118   | 0.035   | $1.79 \times 10^{-4}$ | 0.022      | $7.06 \times 10^{-5}$ |
| Mangrove                           | 0.079    | 0.130   | 0.041   | $2.36 \times 10^{-4}$ | 0.027      | $7.14 \times 10^{-5}$ |

<sup>(1)</sup> TST: Tropical & Sub-tropical

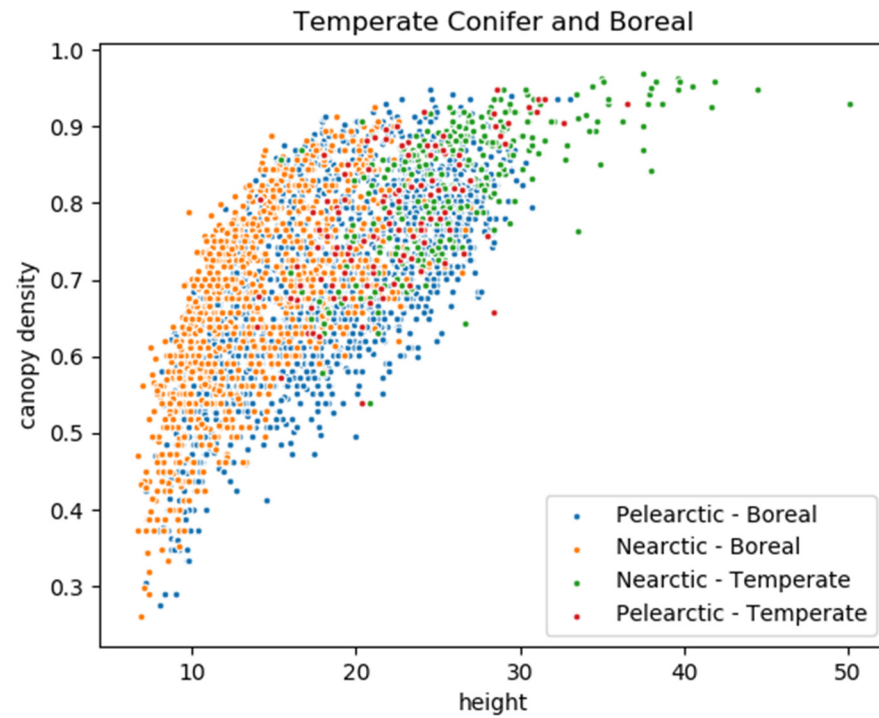

**Figure S4:** Maximum canopy density and maximum height values per realm for the Temperate Conifer and Boreal/Taiga biomes

**Table S3:** Table with, for each biome: histogram of q values per realm, scatterplot of maximum CD and maximum height per realm and map of distribution per realm. The realm colours are maintained across each row.

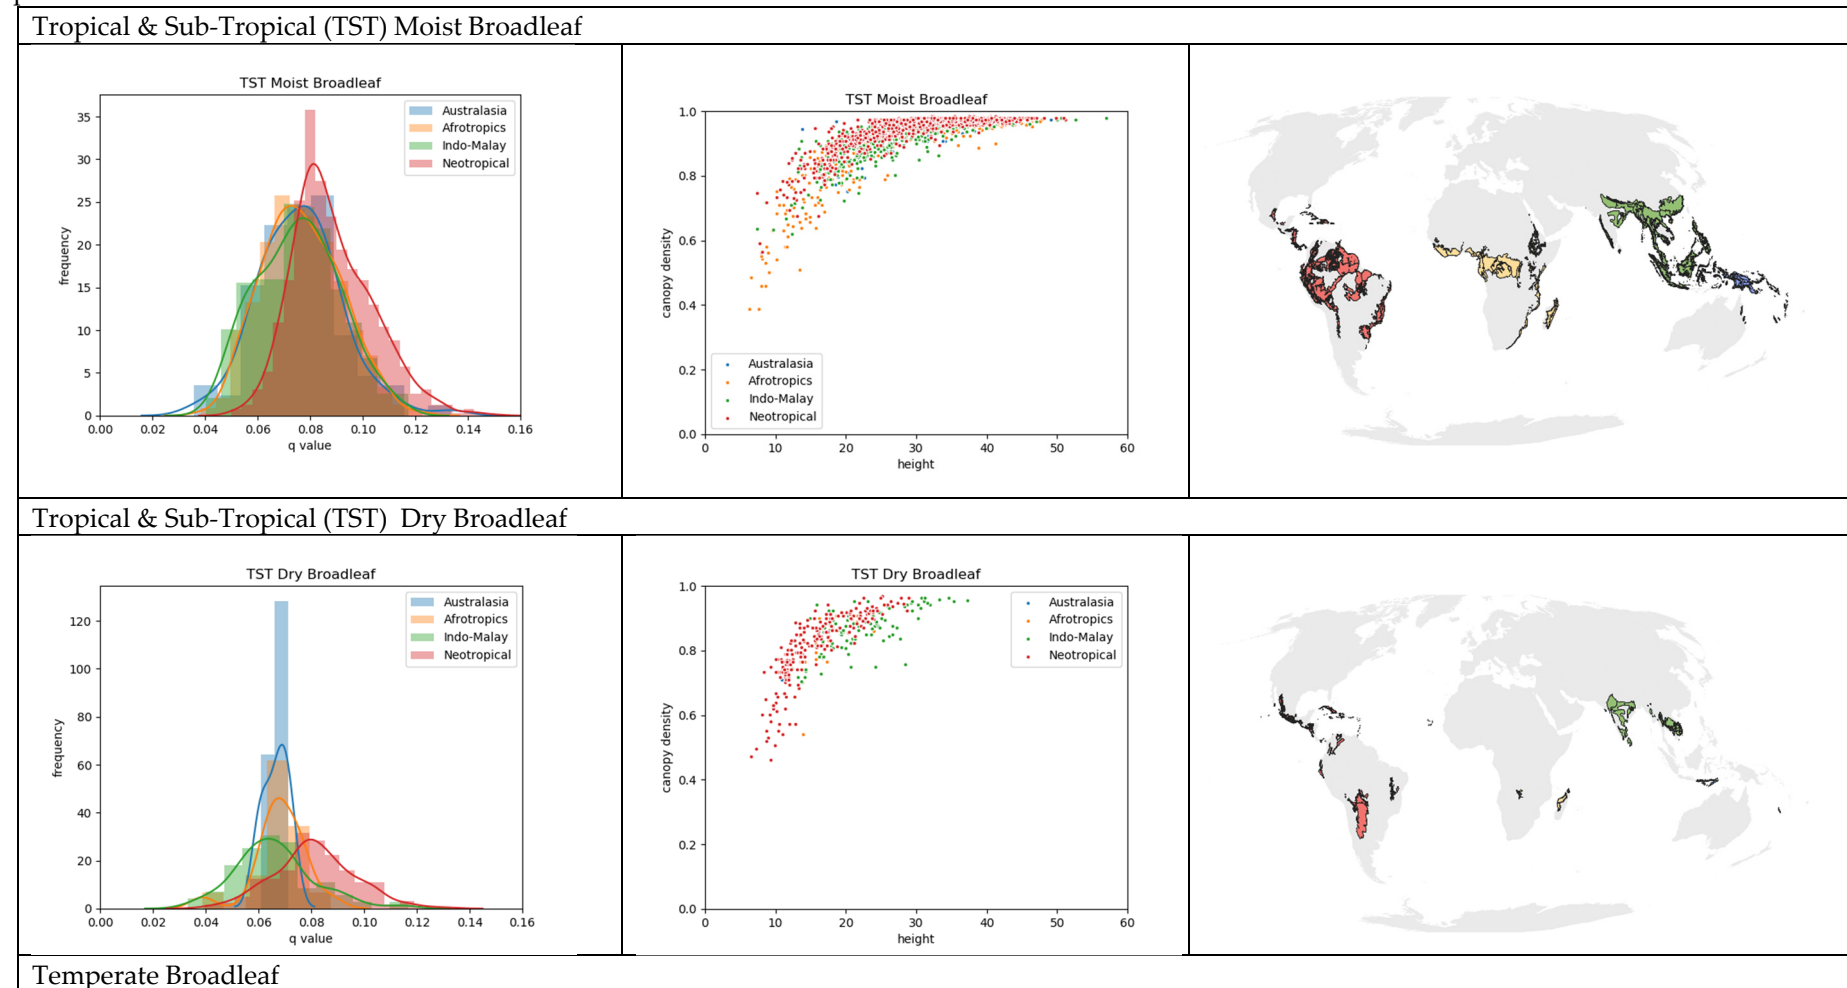

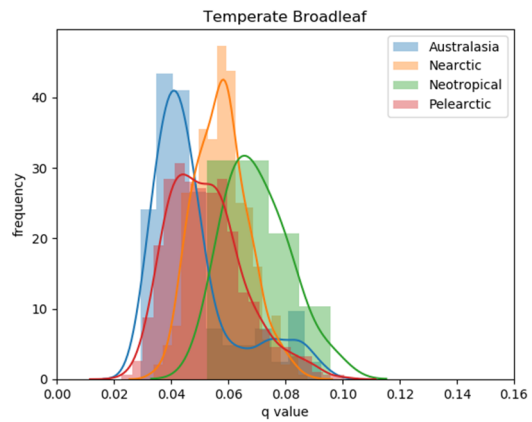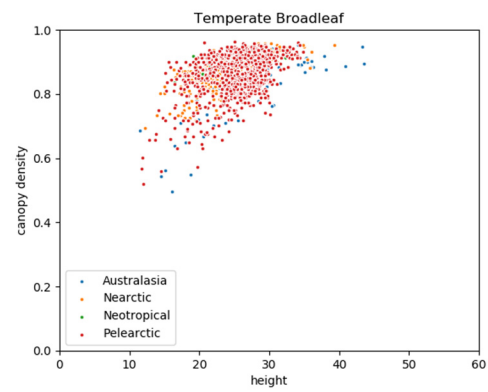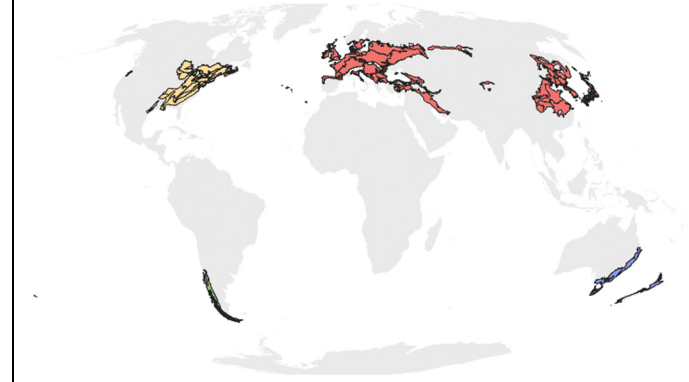

## Temperate Conifer

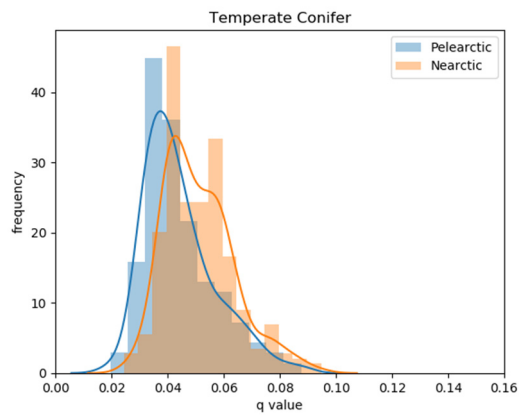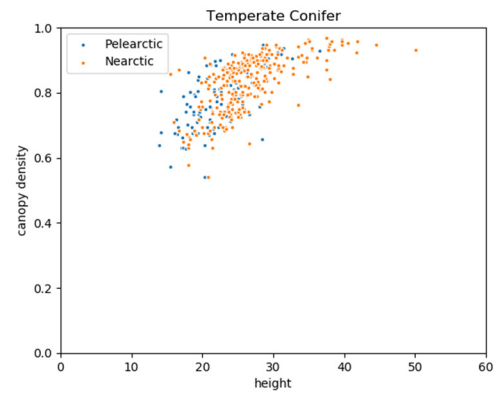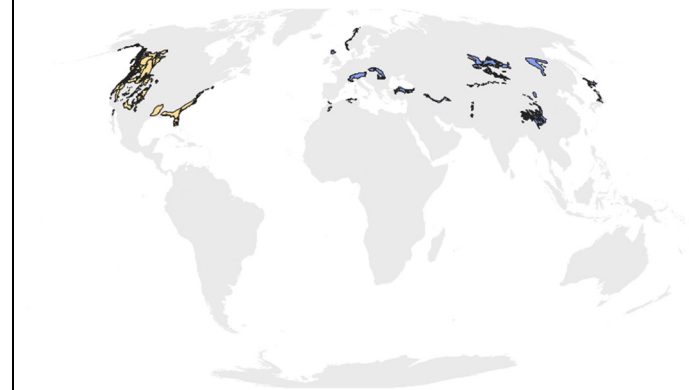

## Boreal/ Taiga

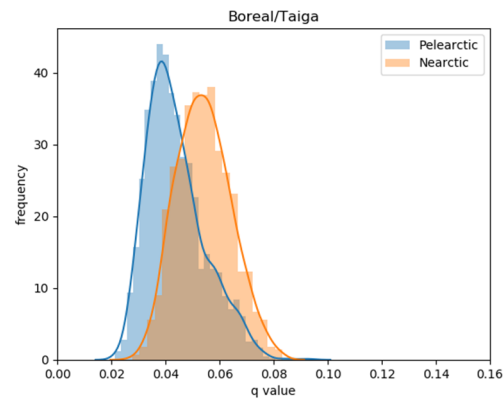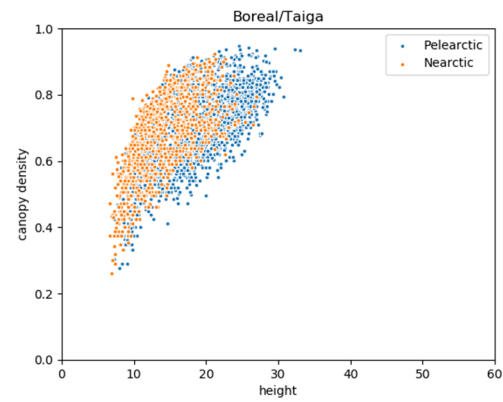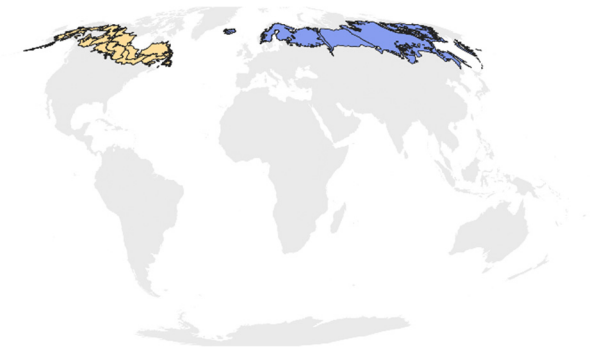

## Tropical & Sub-Tropical (TST) Savanna

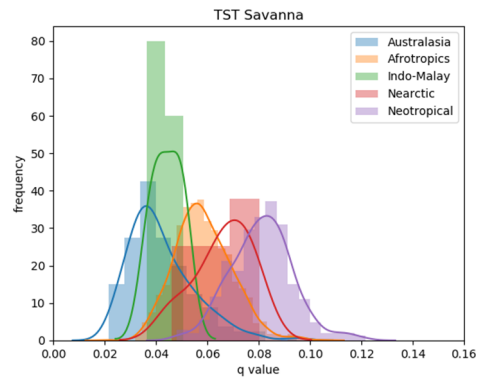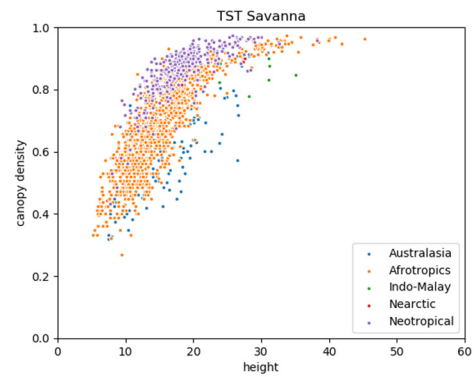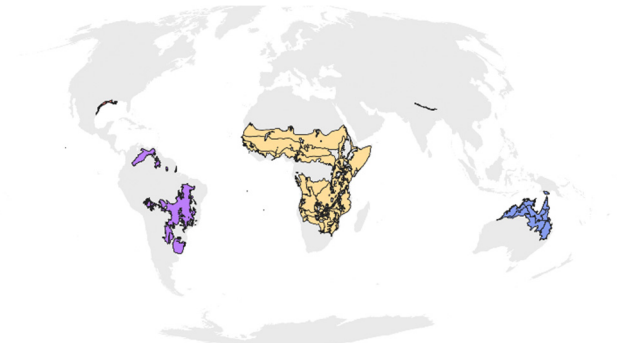

## Temperate Savanna

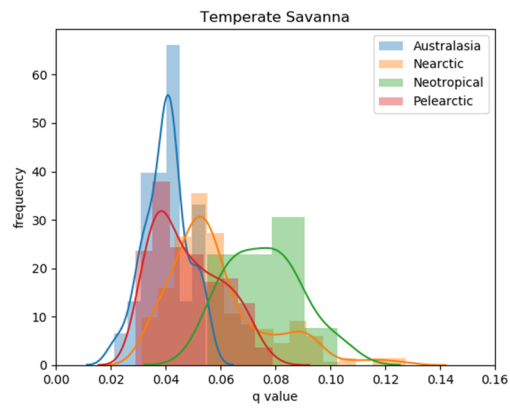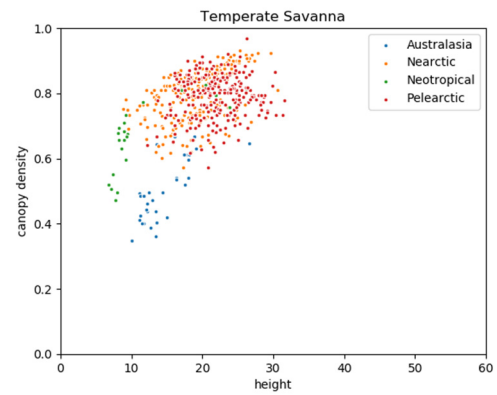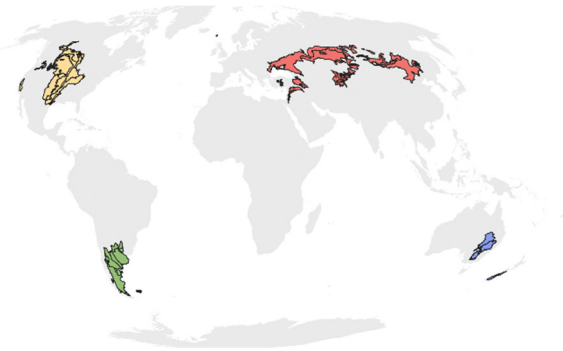

## Flooded Savanna

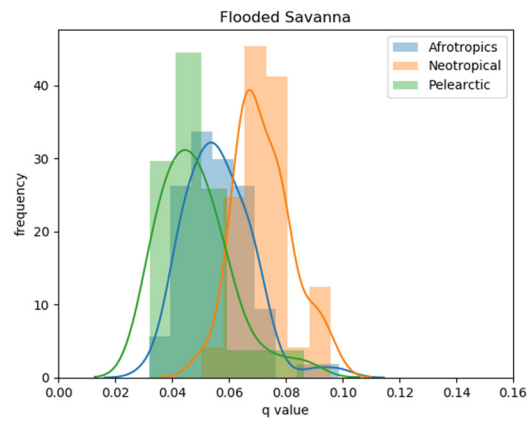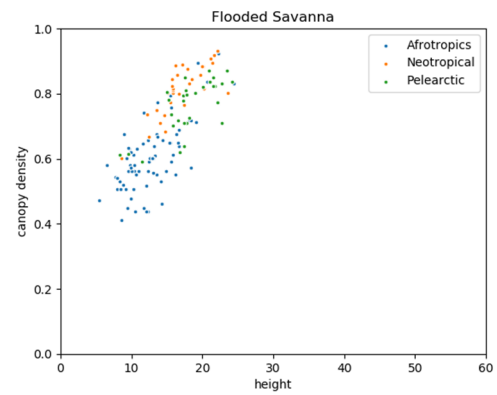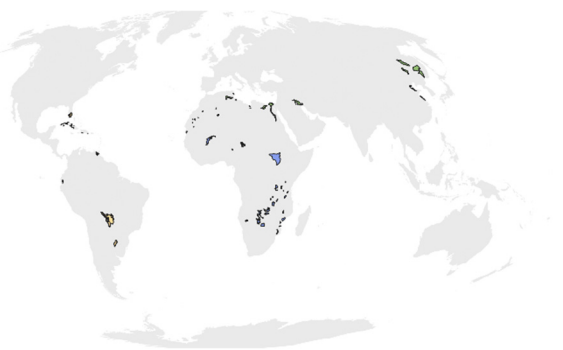

## Montane Shrublands

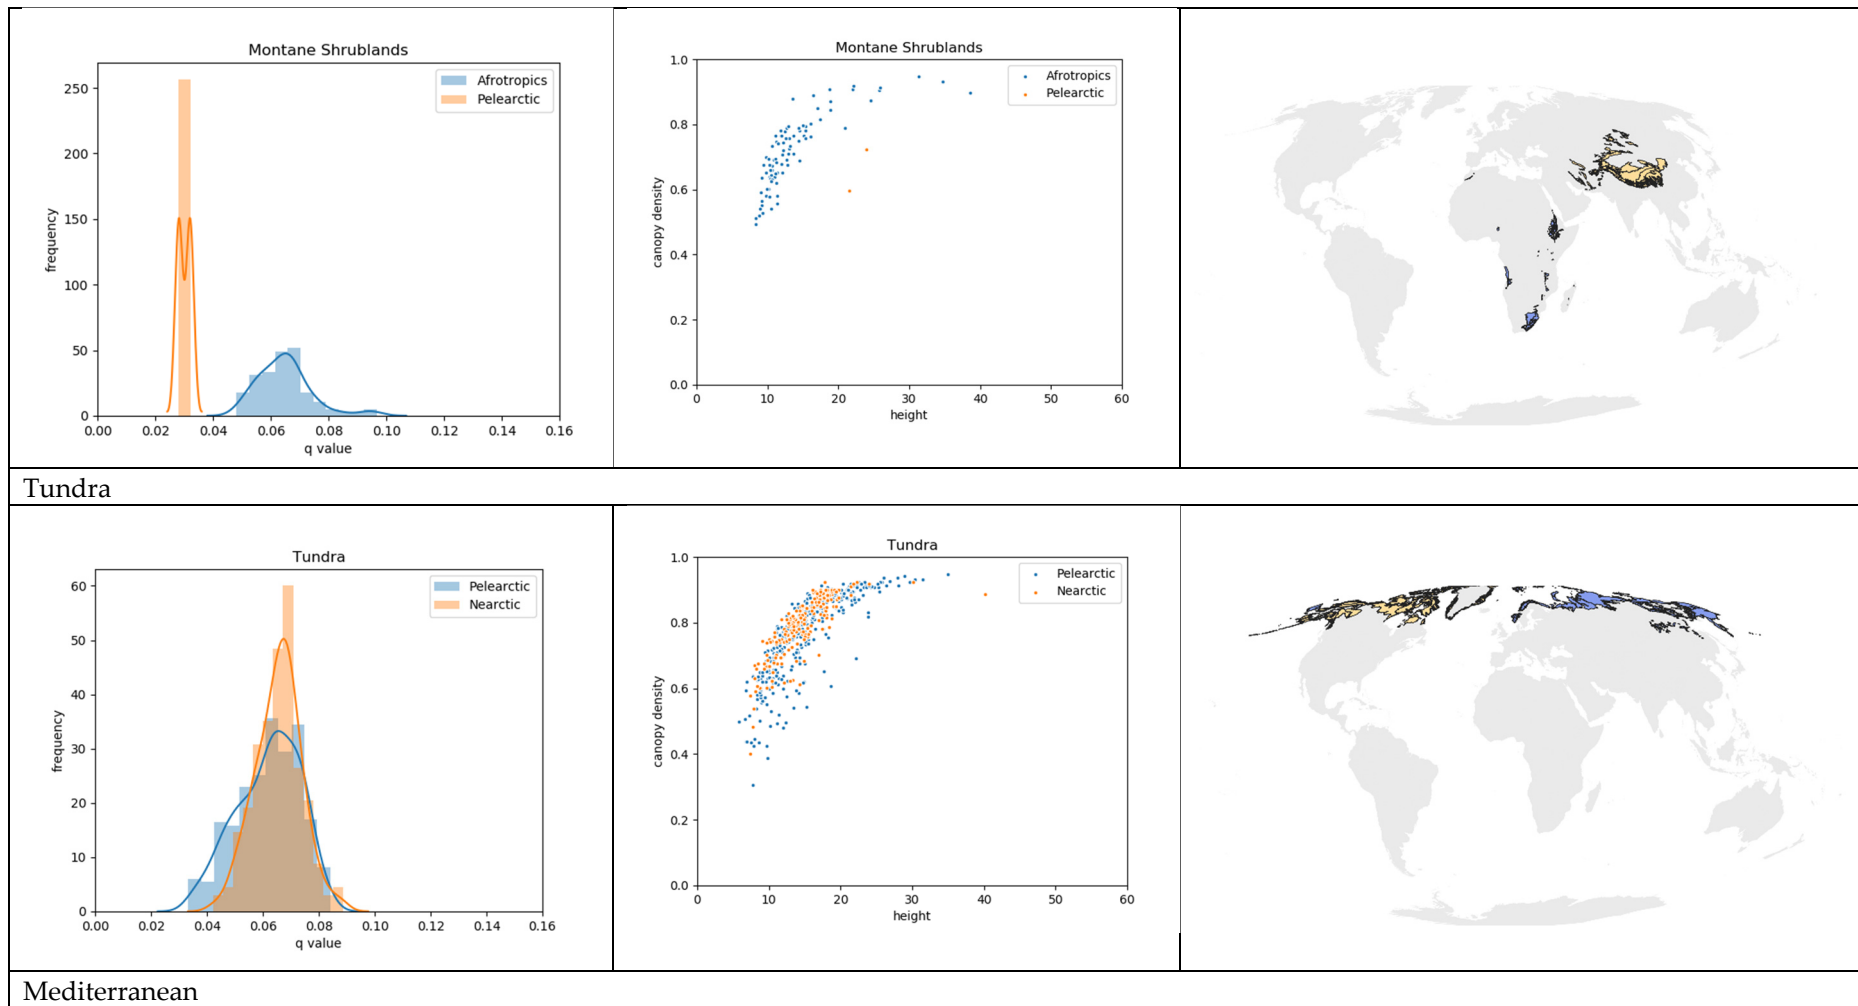

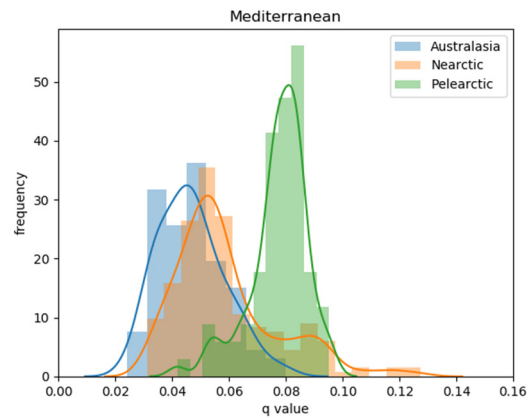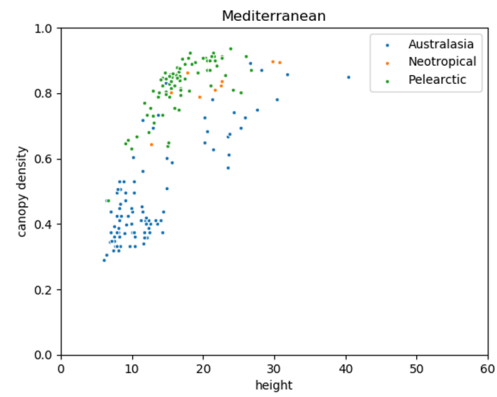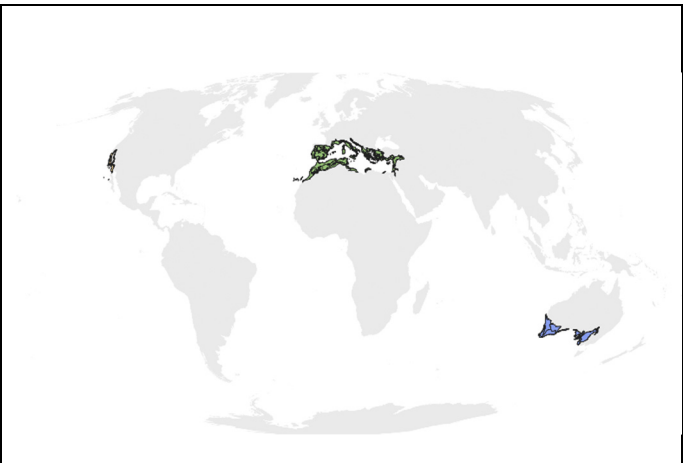

## Deserts

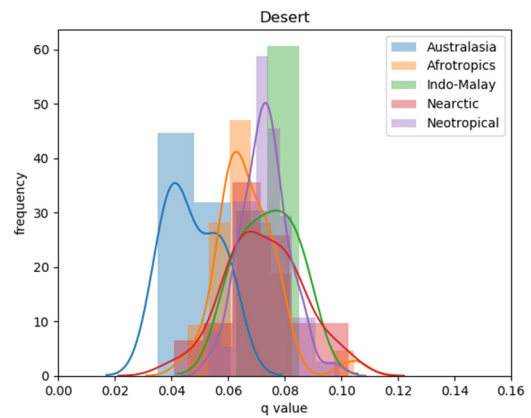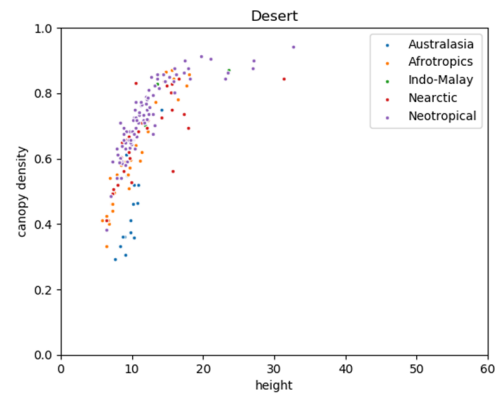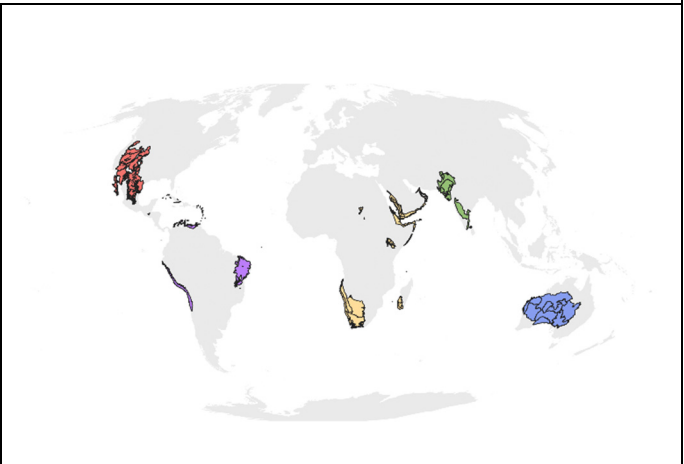

## Mangroves

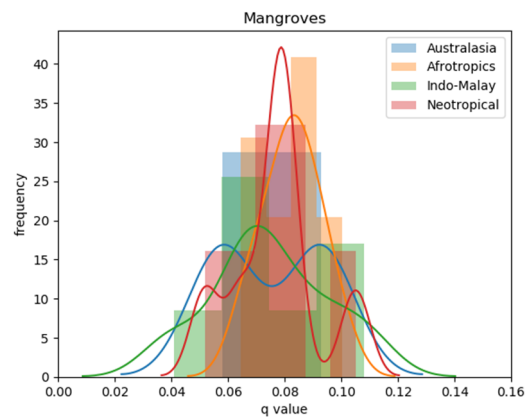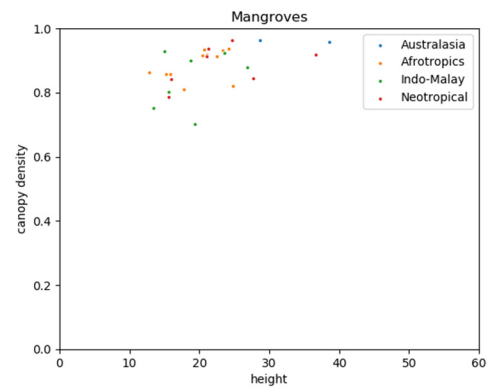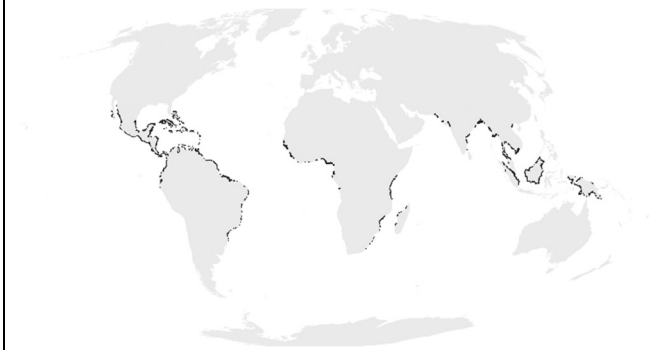

Supplement: s1 [file s1]
